# Supplementary material for: Genetic diversity and population structure of Cynara cardunculus L. in southern Portugal
Source: PLoS One. 2021 Jun 9;16(6):e0252792. doi: 10.1371/journal.pone.0252792 (PMC8189484; doi:10.1371/journal.pone.0252792)
Supplement: S1 Table — The multiplex loci combination and the respectively dyes used during our work, are also indicated. (XLSX) [file pone.0252792.s003.xlsx]

## Sheet: S1 Table
S1 Table: Nucleotide sequences of 23 primer pairs used for PCR amplification of microsatellites (SSRs) used in our study and characterization of those generated SSRs based on nucleotide repeats, number of repeats, linkeage group and expected allele size described on the literature. The multiplex loci combination and the respectively dyes used during our work, are also indicated.
Primer number	Locus name	Forward sequence	Reverse sequence	Dye	Multiplex loci combinations	Repeats and number of repeats	Linkage group	Expected allele size (bp)	GenBank	Reference
		(5’-3’)	(5’-3’)
1	CyEM-053	CCACCCACACCTTCTTCTACA	TCCTGCCATTTTTGTTCCTC	-		(CT)20	LG_IV	327	CL2037Contig1	38
2	CyEM-064	ATATCTCGCGTTTCCATAGGC	GCGATGGATCAACGATAGAGA	-		(CT)15	LG_IX	122	GE590983	38
3	CyEM-093	CCACAAGCTTTCTGACCTCAA	GTCCACCATGTGTAGAAACC	-		(GA)18	LG_XIII	435	GE581834	38
4	CyEM-108	ATCAACAATGCCTTGGTCTCC	CGCTGCTTGGCTTACTTGTTA	-		(ACA)7	LG_IX	102	GE590638	38
5	CyEM-128	GGGACAGTTCACACTTCCGTA	CTCGATCACGATCACACACAC	-		(AG)12	LG_II	120	CL4629Contig1	38
6*	CyEM-138	ACCACAATTTCAACTCCAACG	GCAGAGGAAGGTGATGCATAG	FAM	M2	(TC)12	LG_XVI	130	CL2919Conting1	38
7*	CyEM-183	AGGGTCGGTTGTCTTTCACTC	CGAGAGTTAGCTGAAACTCCAA	FAM	M3	(CAA)7	LG_II	98	GE597664	38
8	CyEM-207	ATCATCATCACCACCATCACC	GGATGATCCAAACACGAGATG	-		(CAC)7	LG_V	257	CL4470Contig1	38
9*	CyEM-229	TCTGTCTTCCCGATCCATCTA	GGCGAGCTCTGATAGGATGTT	HEX	M3	(CT)13	LG_IX	285	GE577281	38
10*	CELMS-03	GATCAATACGTCGTCGCAGA	CTGAGGCTACCAAGGGTTTG	FAM	M4	(TC)18 (AC)7	LG_II	392	EU744919	37
11*	CELMS-05	CCCACCTTCTTATCCCATCA	TGGACGTCTGTTTCCTCCTC	FAM	M1	(CT)22 (GAG)4	LG_I	309	EU744921	37
12	CELMS-08	TTTACAAACTTCCCCTTTCCAC	ACAATACAGATACACGCTCTCCA	-		(TC)22 (TC)8 (TC)10	LG_I	247	EU744924	37
13*	CELMS-11	GCGAATCAATCCCTTGTCTC	AAGCCATGGATGAAGCAGAG	HEX	M4	(TC)21 (TTTG)3	LG_XIV	258	EU744927	37
14*	CELMS-14	TCCAGCCATGCAAGAAAAGTAT	CCATCCTGAATCCATAACCAGT	FAM	M5	(AC)13 (TC)7 (AC)10 (TC)9	LG_VII	210	EU744930	37
15*	CELMS-17	CCCGGATAATAGTCGATGAAGT	CCATGTGAAGATTGGGTGATT	HEX	M5	(GTT)32	LG_XVI	305	EU744933	37
16	CELMS-19	GATGGTGCTTCTTTCTTTTCCT	TAATATCCCAACCGTCCCC	-		(TTG)5 (TTG)6 (TTG)6 (TTG)6	LG_VIII	297	EU744935	37
17	CELMS-20	TTTTATAATTGCAGACTCAAT	TTCATTTCCAACAAGCCT	-		(CAG)5 (CAA)5 (CAA)8 (CAA)12	LG_XI	218	EU744936	37
18	CELMS-23	GGCCCTACCTTAAAATGTCTCC	GACGGTGATTGTTGTAGTGGAA	-		(CCA)5 (CCA)5	LG_XII	241	EU744939	37
19	CELMS-33	GATGCACCACTTTCCTCTCAC	ATATGGGCTTTTCTGGTTGTTC	-		(CAC)4 (CCA)11	LG_X	190	EU744949	37
20	CELMS-41	CCAAAGCCTTCAGAGCATTC	GGAATGATGTATGGATCGCC	-		(ATG)11 (GAT)9	LG_V	271	EU744957	37
21*	CELMS-58	GGATTCCATTGGACTTACAGG	GGTTTGCCTATCTCTGTCTTTCTT	HEX	M2	(AG)18 (AGAA)3	LG_I	259	EU744974	37
22*	CELMS-61	TGCAAACCAGAAACTGCTTG	TGCAGACTTTACCTCCACCA	HEX	M1	(CT)18 (GT)8	LG_II	170	EU744977	37
23	Clib-12	TGGACTACTGCAAGAAGAAACC	CATGGACTTTCACCTTTACCC	-		(CA)4 GA(CA)7 (TA)4	LG_V	232	AF527032	39
Note: The asterisk marks represent SSRs showing robust amplification profiles used in the large scale amplification.
